# Supplementary material
Source: MDPI journal article supplement (https://www.mdpi.com/2073-4441/15/19/3381)
Supplement: s1 [file s1]

## Supplemental Materials

This document details the data used to calculate the direct economic impacts of taking a standard 150-acre irrigated farm out of production in each county of the study area ( $EI_{Ag\ Direct, c, t}$ ).

### S.1 Calculating $EI_{Ag\ Direct, c, t}$

The components of  $EI_{Ag\ Direct, c, t}$  are restated in equations S1, S2, and S3.

$$S_{c,y} = \frac{HA_{c,y}}{\sum_Y HA_{c,y}} \quad (S1)$$

$$EI_{Ag\ Direct, c, y, t} = S_{c,y} \times 150 \times P_{y,t} \times Q_{y,t} \quad (S2)$$

$$EI_{Ag\ Direct, c, t} = \sum_Y EI_{Ag\ Direct, c, y, t} \quad (S3)$$

Where  $HA_{c,y}$ : Harvested irrigated acres of crop  $y$  in county  $c$

$S_{c,y}$ : Share of harvested irrigated acres of crop  $y$  in county  $c$

$P_{y,t}$ : Price of crop  $y$  in year  $t$

$Q_{y,t}$ : Yield per acre of crop  $y$  in year  $t$

In 2009, 2016, and 2020, researchers from University of Georgia and Albany State University were contracted by the Georgia Department of Natural Resources (GADNR) to map irrigated agricultural fields in ArcGIS using aerial images. Those maps are proprietary data owned by the GADNR. The 2020 map of irrigated fields was overlaid with 2020 data from CropScape (available at <https://nassgeodata.gmu.edu/CropScape/>) and county boundaries to identify the acreage of crops grown on irrigated fields in each county of the state. Those data were used to estimate the harvested irrigated acres of each crop in each county ( $HA_{c,y}$ ) and are presented in Table S1.

Table S1: 2020 Harvested Irrigated Acres, by Crop and County

| County    | Corn   | Cotton | Peanut | Soybean | TOTAL  |
|-----------|--------|--------|--------|---------|--------|
| Baker     | 9,645  | 12,399 | 16,143 | 6       | 38,193 |
| Calhoun   | 8,383  | 5,843  | 9,843  | 77      | 24,146 |
| Decatur   | 12,502 | 21,810 | 27,622 | 487     | 62,421 |
| Dougherty | 2,026  | 3,734  | 2,184  | 6       | 7,950  |
| Early     | 7,978  | 15,971 | 17,169 | 75      | 41,193 |
| Lee       | 11,095 | 14,529 | 7,943  | 131     | 33,698 |
| Miller    | 14,196 | 16,840 | 23,494 | 65      | 54,595 |
| Mitchell  | 12,557 | 30,903 | 27,981 | 50      | 71,491 |
| Randolph  | 8,130  | 6,466  | 9,483  | 875     | 24,954 |
| Terrell   | 10,257 | 10,029 | 6,898  | 492     | 27,676 |
| Worth     | 5,050  | 27,236 | 17,013 | 34      | 49,333 |

The crop acreage shares ( $S_{c,y}$ ) are calculated via equation S3 using the data in Table S1. The resulting shares are presented in Table S2.

Table S2: 2020 Share of Irrigated Acreage, by Crop and County

| County    | Corn  | Cotton | Peanut | Soybean | TOTAL |
|-----------|-------|--------|--------|---------|-------|
| Baker     | 0.253 | 0.325  | 0.423  | 0.000   | 1     |
| Calhoun   | 0.347 | 0.242  | 0.408  | 0.003   | 1     |
| Decatur   | 0.200 | 0.349  | 0.443  | 0.008   | 1     |
| Dougherty | 0.255 | 0.470  | 0.275  | 0.001   | 1     |
| Early     | 0.194 | 0.388  | 0.417  | 0.002   | 1     |
| Lee       | 0.329 | 0.431  | 0.236  | 0.004   | 1     |
| Miller    | 0.260 | 0.308  | 0.430  | 0.001   | 1     |
| Mitchell  | 0.176 | 0.432  | 0.391  | 0.001   | 1     |
| Randolph  | 0.326 | 0.259  | 0.380  | 0.035   | 1     |
| Terrell   | 0.371 | 0.362  | 0.249  | 0.018   | 1     |
| Worth     | 0.102 | 0.552  | 0.345  | 0.001   | 1     |

Price and yield information for each crop and county are taken from the Georgia Farm Gate Value Report 2020 (available at <https://caed.uga.edu/publications/farm-gate-value.html>) and used in equation S2 to calculate  $EI_{Ag\ Direct, c, y}$ . The price and yield data are reported in Table S3.

Table S3: 2020 Crop Price and Yield, by County

| County    | Corn   |         | Cotton |         | Peanut |         | Soybean |         |
|-----------|--------|---------|--------|---------|--------|---------|---------|---------|
|           | \$/bu  | Bu/acre | \$/lb  | Lb/acre | \$/lb  | Lb/acre | \$/bu   | Bu/acre |
| Baker     | \$4.25 | 180     | \$0.70 | 900     | \$0.22 | 4300    | \$10.00 | 60      |
| Calhoun   | \$4.90 | 200     | \$0.65 | 1000    | \$0.22 | 4600    | \$8.35  | 52      |
| Decatur   | \$4.30 | 216     | \$0.65 | 869     | \$0.20 | 4533    | \$10.40 | 41      |
| Dougherty | \$4.30 | 180     | \$0.65 | 887     | \$0.20 | 5200    | \$10.40 | 41      |
| Early     | \$4.30 | 190     | \$0.70 | 880     | \$0.20 | 4250    | \$10.40 | 45      |
| Lee       | \$3.90 | 186     | \$0.65 | 1000    | \$0.19 | 4100    | \$10.40 | 41      |
| Miller    | \$4.30 | 190     | \$0.70 | 915     | \$0.23 | 4700    | \$12.00 | 45      |
| Mitchell  | \$4.30 | 202     | \$0.65 | 900     | \$0.20 | 4245    | \$10.40 | 41      |
| Randolph  | \$4.90 | 190     | \$0.65 | 900     | \$0.20 | 4400    | \$11.00 | 47      |
| Terrell   | \$4.25 | 190     | \$0.75 | 1100    | \$0.22 | 4000    | \$11.00 | 50      |
| Worth     | \$4.30 | 205     | \$0.65 | 930     | \$0.20 | 4300    | \$10.40 | 45      |

## S.2 Calculating County-level Fixed Costs of Source Switching ( $FC_c$ )

The fixed costs from source switching are calculated using equation 12 in the main text, shown here as equation S4.  $FC_c$  depends on the costs per foot of drilling, lining, and capping the well ( $C_{Drilling,c,t}$ ) in county  $c$  in year  $t$ , and the well depth ( $Depth_c$ ).  $Depth_c$  is the average depth (feet) to the aquifer in county  $c$ .

$$FC_{c,t} = C_{Drilling,c,t} \times Depth_c \quad (S4)$$

To estimate  $C_{Drilling,c,t}$ , four irrigation well drilling companies located in the lower Flint River Basin were interviewed by phone in March of 2021. The drilling companies all emphasized that actual costs would vary by location, depending on geological conditions encountered at the well site. Nonetheless, from those interviews, the average cost per foot for a

new well in the study area was \$240/foot in 2021. We used the US Bureau of Labor Statistics inflation calculator (available at [https://www.bls.gov/data/inflation\\_calculator.htm](https://www.bls.gov/data/inflation_calculator.htm)) to convert the 2021 cost estimate to 2020 dollars (\$233.88/foot).

Average well depth to the Claiborne aquifer by county was used to estimate  $Depth_c$ . The data used to calculate  $Depth_c$  are reported in Table S4. Those data come from the USGS website <http://doi.org/waterdata.usgs.gov/nwis/>.

### S.3 Calculating County-level Extra Pumping Costs of Source Switching ( $VC_c$ )

The extra pumping costs of source switching were calculated using equations S5-S8.

$$\Delta TDH_c = psi \times 2.31 + \Delta Depth_c \quad (S5)$$

$$Water_{ESS,c,t} = \sum_{y=1}^4 WD_{ESS,c,y,t} \times S_{c,y} \times 150 \quad (S6)$$

$$\Delta Total \text{ fuel consumed}_{ESS,c,t} = Fuel \text{ usage} \times \Delta TDH_c \times Water_{ESS,c,t} \quad (S7)$$

$$VC_{ESS,c,t} = \Delta Total \text{ fuel consumed}_{ESS,c,t} \times P_{Electricity,t} \quad (S8)$$

In equation S5, the average well depth in the Claiborne aquifer reported in Table S4 is used as an estimate for  $\Delta Depth_c$  when switching from a surface water source to the Claiborne. When switching for a Floridan aquifer well to a well in the Claiborne, the difference between a county's average well depth in the two aquifers is used.

In equation S6, the acreage shares for each crop reported in Table S2 are used for  $S_{c,t}$ .  $WD_{ESS,c,y,t}$  is the water application rate (acre-feet/acre) for crop  $y$  in county  $c$  in year  $t$  during a drought year or an average year. The Decision Support System for Agrotechnology Transfer (DSSAT) was used to model irrigation application rates in the study area under historical weather conditions from 1950-2020. DSSAT is available for download at <https://dssat.net/data>. The 90th

percentile water application rate from the DSSAT runs for each crop and county was used as the estimate of  $WD_{ESS,c,y,t}$  during drought. The 50th percentile water application rate was used as the estimate of  $WD_{SSS,c,y,t}$ . Those values are presented in Table S5.

We use the electricity fuel requirement of 1.55 kwh/acre-foot/foot reported in Roger (1999) as our estimate of Fuel Usage. The price of electricity is from Georgia Power, the electricity provider in the study area. We used a weighted average of the “Off-Peak” Irrigation Rate (<https://www.georgiapower.com/content/dam/georgia-power/pdfs/electric-service-tariff-pdfs/IOP-15.pdf>) and the “On-Peak” Farm Service Schedule rate (<https://www.georgiapower.com/content/dam/georgia-power/pdfs/electric-service-tariff-pdfs/FS-11.pdf>), assuming 1/3 of irrigation water is applied on-peak (between noon and 8:00 pm) and the other 2/3 is applied off-peak.

Table S4: Well Depth Data

| County | Aquifer  | Site Code | Interval (Year) | Well depth (ft) | Average Well Depth |
|--------|----------|-----------|-----------------|-----------------|--------------------|
| Baker* | Floridan | 12K014*   | 1989 - 2019     | 137             | 153.32             |
|        |          | 09J008*   | 1977 - 2000     | 157             |                    |
|        |          | 10H009*   | 1998 - 2021     | 200             |                    |
|        |          | 09H014    | 1983 - 1999     | 200             |                    |
|        |          | 10H007    | 1995 - 2015     | 169             |                    |
|        |          | 09H004    | 1979 - 1982     | 180             |                    |
|        |          | 09J007    | 1964            | 158             |                    |
|        |          | 09J011    | 1969            | 165             |                    |
|        |          | 09J016    | 1969            | 120             |                    |
|        |          | 08J018    | 1977 - 2010     | 170             |                    |
|        |          | 09J004    | 1977 - 2010     | 245             |                    |
|        |          | 09J018    | 1977            | 250             |                    |
|        |          | 10J004    | 1977 - 1998     | 140             |                    |
|        |          | 10J009    | 1995 - 2019     | 100             |                    |
|        |          | 09J003    | 1977 - 1998     | 120             |                    |
|        |          | 10J010    | 2010            | 80              |                    |
|        |          | 09J015    | 2010            | 102             |                    |
|        |          | 09J001    | 1979 - 1981     | 115             |                    |
|        |          | 11J020    | 1985 - 1999     | 196             |                    |
|        |          | 10K010    | 1985            | 160             |                    |
|        |          | 10K008    | 2002            | 120             |                    |
|        |          | 12K008    | 1977 - 1999     | 195             |                    |
|        |          | 12K009    | 1977 - 2011     | 160             |                    |

|          |           |         |                |     |           |
|----------|-----------|---------|----------------|-----|-----------|
|          |           | 10K006  | 1990 -<br>1999 | 100 |           |
|          |           | 12K130  | 1987 -<br>1999 | 94  |           |
|          | Claiborne | 11J023  | 1995 -<br>2015 | 560 | 430.2     |
|          |           | 11J024  | 1995           | 560 |           |
|          |           | 09J014  | 1974           | 401 |           |
|          |           | 10J012  | 1987           | 390 |           |
|          |           | 11J014  | 1977 -<br>1999 | 240 |           |
| Calhoun* | Floridan  | 10K005* | 1987 -<br>2021 | 138 | 150.07692 |
|          |           | 08K023  | 2010           | 135 |           |
|          |           | 08K021  | -              | 130 |           |
|          |           | 08K019  | 2009           | 130 |           |
|          |           | 10K005  | 1983 -<br>2021 | 138 |           |
|          |           | 09K012  | 2010 -<br>2011 | 225 |           |
|          |           | 09L031  | 2010           | 250 |           |
|          |           | 09L029  | 2010 -<br>2011 | 107 |           |
|          |           | 08L019  | -              | 170 |           |
|          |           | 09L030  | 2010 -<br>2011 | 143 |           |
|          |           | 07L005  | 1979 -<br>2011 | 140 |           |
|          |           | 09L006  | 1979 -<br>1994 | 140 |           |
|          |           | 10L002  | 1959 -<br>1998 | 105 |           |
|          | Claiborne | 09K003  | 1969 -<br>2012 | 545 | 372.25    |
|          |           | 07L004  | 1979 -<br>2009 | 140 |           |
|          |           | 07L005  | 1979 -<br>2011 | 157 |           |
|          |           | 07L001  | 1979 -<br>2011 | 647 |           |
| Decatur* | Floridan  | 08E038* | 2004 -<br>2021 | 148 | 204.82927 |
|          |           | 09E009* | 1999 -<br>2021 | 360 |           |

|  |         |                |     |  |
|--|---------|----------------|-----|--|
|  | 08E039* | 2002 -<br>2021 | 65  |  |
|  | 09E005* | 1999 -<br>2021 | 80  |  |
|  | 09F520* | 1982 -<br>2021 | 251 |  |
|  | 10G001* | 1982 -<br>2021 | 160 |  |
|  | 09G001* | 1982 -<br>2021 | 255 |  |
|  | 08D006  | 2000 -<br>2016 | 380 |  |
|  | 07D006  | 1991 -<br>2006 | 340 |  |
|  | 07D004  | 1999 -<br>2010 | 120 |  |
|  | 08D003  | 1999 -<br>2011 | 300 |  |
|  | 08D002  | 2000 -<br>2012 | 340 |  |
|  | 08D090  | 2000 -<br>2016 | 340 |  |
|  | 08D007  | 2000 -<br>2012 | 300 |  |
|  | 08E023  | 1999 -<br>2000 | 280 |  |
|  | 07E009  | 1999 -<br>2011 | 320 |  |
|  | 07E062  | 1999 -<br>2011 | 300 |  |
|  | 08E024  | 1999 -<br>2011 | 216 |  |
|  | 07E001  | 1999 -<br>2011 | 154 |  |
|  | 07E008  | 1999 -<br>2011 | 145 |  |
|  | 08E040  | 2002 -<br>2004 | 285 |  |
|  | 09E521  | 2000 -<br>2011 | 294 |  |
|  | 08E019  | 1999 -<br>2011 | 147 |  |
|  | 08E022  | 1999 -<br>2011 | 85  |  |



|            |           |         |             |     |           |
|------------|-----------|---------|-------------|-----|-----------|
|            |           | 08E021  | 1999-2011   | 125 |           |
|            |           | 08E020  | 1999 - 2000 | 88  |           |
|            |           | 09E383  | 1954        | 244 |           |
|            |           | 09E003  | 1999 - 2011 | 75  |           |
|            |           | 08E031  | 2000 - 2001 | 240 |           |
|            |           | 09E008  | 1999 - 2000 | 320 |           |
|            |           | 08E035  | 2000        | 115 |           |
|            |           | 10G229  | 1962        | 160 |           |
|            |           | 10G184  | 1962        | 142 |           |
|            |           | 10G002  | 1977        | 116 |           |
|            |           | 10G005  | 1979 - 1986 | 190 |           |
|            |           | 08G009  | 2002        | 100 |           |
|            |           | 08G002  | 1978        | 170 |           |
|            |           | 09F006  | 1979        | 250 |           |
|            |           | 10F004  | 1979 - 2011 | 120 |           |
|            |           | 08F513  | 2010 - 2011 | 195 |           |
|            |           | 08F004  | 1961        | 83  |           |
|            | Claiborne | 08F515  | 2015        | 800 | 821.66667 |
|            |           | 09G020  | 2010        | 760 |           |
|            |           | 10D002  | 1960        | 905 |           |
| Dougherty* | Floridan  | 11K027  | 1972 - 1998 | 100 | 147.15029 |
|            |           | 12K132* | 1966 - 2021 | 110 |           |
|            |           | 12K037* | 1996 - 2021 | 200 |           |
|            |           | 13K014* | 1982 - 2021 | 131 |           |
|            |           | 11K015* | 1982 - 2021 | 177 |           |
|            |           | 12K124* | 1987 - 2021 | 182 |           |
|            |           | 12K117* | 1987 - 2021 | 190 |           |

|  |         |                |     |  |
|--|---------|----------------|-----|--|
|  | 12K173* | 1998 -<br>2021 | 180 |  |
|  | 11K003  | 2007 -<br>2021 | 150 |  |
|  | 12K168* | 1997 -<br>2021 | 180 |  |
|  | 12K175* | 1998 -<br>2021 | 187 |  |
|  | 12K063* | 1998 -<br>2021 | -   |  |
|  | 12K180* | 2007 -<br>2021 | 170 |  |
|  | 12K170* | 1997 -<br>2021 | 180 |  |
|  | 12L373* | 2002 -<br>2021 | 170 |  |
|  | 12L348* | 1997 -<br>2021 | 180 |  |
|  | 12L340* | 1997 -<br>2021 | 178 |  |
|  | 12L405  | 2015 -<br>2021 | 180 |  |
|  | 12L277* | 2007 -<br>2021 | 203 |  |
|  | 12L356* | 1998 -<br>2021 | 160 |  |
|  | 12L346* | 1989 -<br>2021 | 160 |  |
|  | 12L273* | 1987 -<br>2021 | 120 |  |
|  | 12L344* | 1997 -<br>2021 | 160 |  |
|  | 12L375* | 2001 -<br>2021 | 105 |  |
|  | 12L268* | 1987 -<br>2021 | -   |  |
|  | 13L180* | 2007 -<br>2021 | 310 |  |
|  | 12L269* | 1987 -<br>2021 | 164 |  |
|  | 12L028* | 1982 -<br>2021 | 100 |  |

|  |         |                |     |  |
|--|---------|----------------|-----|--|
|  | 12L029* | 1982 -<br>2021 | 178 |  |
|  | 13L049* | 2007 -<br>2021 | 170 |  |
|  | 13K017  | 1984 -<br>2011 | 132 |  |
|  | 12K136  | 1993 -<br>1995 | 215 |  |
|  | 12K137  | 1993 -<br>1994 | 85  |  |
|  | 11K033  | 1982 -<br>2011 | 77  |  |
|  | 12K126  | 1988 -<br>1989 | 224 |  |
|  | 12K016  | 1982 -<br>2012 | 131 |  |
|  | 12K053  | 1970 -<br>2007 | 85  |  |
|  | 13K011  | 1977 -<br>2008 | 430 |  |
|  | 12K101  | 1985 -<br>2018 | 120 |  |
|  | 12K171  | 1998 -<br>2016 | 140 |  |
|  | 11K004  | 1979 -<br>1998 | 150 |  |
|  | 11K043  | 1992 -<br>2011 | 170 |  |
|  | 12K129  | 1988 -<br>2016 | 211 |  |
|  | 11K003  | 1979 -<br>2021 | 150 |  |
|  | 12K169  | 1977           | 180 |  |
|  | 11K046  | 1995 -<br>1997 | 115 |  |
|  | 12K167  | 1996 -<br>1998 | 57  |  |
|  | 12K151  | 1995           | 200 |  |
|  | 12K152  | 1995           | 80  |  |
|  | 12K154  | 1995           | 200 |  |
|  | 12K155  | 1995           | 80  |  |

|  |        |                |     |  |
|--|--------|----------------|-----|--|
|  | 12K123 | 1988 -<br>2019 | 242 |  |
|  | 12K148 | 1995 -<br>2000 | 200 |  |
|  | 12K150 | 1995           | 30  |  |
|  | 12K147 | 1995 -<br>2003 | 185 |  |
|  | 11K044 | 1992 -<br>1998 | 200 |  |
|  | 11K028 | 1975 -<br>2008 | 155 |  |
|  | 12K166 | 1996 -<br>1998 | 93  |  |
|  | 12K144 | 1995 -<br>1998 | 200 |  |
|  | 12K145 | 1995 -<br>1998 | 80  |  |
|  | 12K146 | 1995 -<br>1998 | 30  |  |
|  | 12K122 | 1988 -<br>2001 | 98  |  |
|  | 12K172 | 1998 -<br>2018 | 125 |  |
|  | 12K162 | 1965           | 247 |  |
|  | 12K141 | 1996 -<br>2016 | 200 |  |
|  | 12K142 | 1995 -<br>2011 | 80  |  |
|  | 12K143 | 1995 -<br>2014 | 30  |  |
|  | 12K160 | -              | 233 |  |
|  | 12K163 | 1966           | 245 |  |
|  | 12K015 | 1984 -<br>1985 | 114 |  |
|  | 12K161 | 1961           | 207 |  |
|  | 12K094 | 1979 -<br>2003 | 115 |  |
|  | 12K165 | 1969           | 265 |  |
|  | 12K007 | 1951 -<br>1953 | 79  |  |
|  | 12K164 | 1969           | 260 |  |

|  |  |        |                |     |  |
|--|--|--------|----------------|-----|--|
|  |  | 13K092 | 1996 -<br>1997 | 144 |  |
|  |  | 12K174 | -              | 180 |  |
|  |  | 12K006 | 1951 -<br>1961 | 247 |  |
|  |  | 12K182 | -              | 200 |  |
|  |  | 12L338 | 1996 -<br>1998 | 57  |  |
|  |  | 12L349 | 1997           | 165 |  |
|  |  | 12L339 | 1997 -<br>2017 | 187 |  |
|  |  | 12L347 | 1997 -<br>2021 | 160 |  |
|  |  | 11L078 | 1974 -<br>1994 | 100 |  |
|  |  | 12L377 | 1997           | 170 |  |
|  |  | 12L370 | 2000 -<br>2017 | 172 |  |
|  |  | 12L372 | 2000 -<br>2017 | 58  |  |
|  |  | 12L380 | 2000           | 158 |  |
|  |  | 12L381 | 1999           | 165 |  |
|  |  | 12L352 | 1998 -<br>2015 | 100 |  |
|  |  | 12L378 | 2000           | 179 |  |
|  |  | 12L061 | 1971 -<br>2013 | 195 |  |
|  |  | 12L405 | 2015 -<br>2021 | 195 |  |
|  |  | 12L350 | 2012 -<br>2013 | 92  |  |
|  |  | 13L048 | 1982 -<br>2005 | 345 |  |
|  |  | 12L341 | 1997 -<br>2000 | 153 |  |
|  |  | 12L363 | -              | 59  |  |
|  |  | 12L382 | 1999           | 168 |  |
|  |  | 12L342 | 1997 -<br>2018 | 100 |  |
|  |  | 12L357 | 1998 -<br>2008 | 160 |  |

|  |        |                |     |  |
|--|--------|----------------|-----|--|
|  | 12L343 | 1997 -<br>2016 | 200 |  |
|  | 12L368 | -              | 59  |  |
|  | 13L012 | 1978 -<br>2019 | 218 |  |
|  | 12L351 | 1998 -<br>2018 | 165 |  |
|  | 12L367 | -              | 39  |  |
|  | 12L030 | 1982 -<br>2017 | 180 |  |
|  | 12L050 | 1983 -<br>2011 | 22  |  |
|  | 12L310 | 1991 -<br>2018 | 250 |  |
|  | 13L031 | 1978 -<br>1998 | 290 |  |
|  | 12L345 | 1997 -<br>2021 | 160 |  |
|  | 12L312 | 1991 -<br>1998 | 110 |  |
|  | 12L311 | 1991 -<br>2010 | 100 |  |
|  | 13L032 | 1978 -<br>1998 | 285 |  |
|  | 12L326 | 1994 -<br>2015 | 115 |  |
|  | 13L202 | 1994 -<br>1997 | 98  |  |
|  | 12L328 | -              | 43  |  |
|  | 12L309 | 1991 -<br>2011 | 29  |  |
|  | 11L114 | 1992 -<br>1998 | 180 |  |
|  | 12L305 | 1994 -<br>2011 | 22  |  |
|  | 13L182 | 1996 -<br>1998 | 270 |  |
|  | 13L179 | 1996 -<br>1998 | 120 |  |
|  | 13L191 | 1996 -<br>1997 | 130 |  |

|  |        |                |     |  |
|--|--------|----------------|-----|--|
|  | 11L113 | 1992 -<br>2012 | 98  |  |
|  | 12L048 | 1987 -<br>1998 | 85  |  |
|  | 11L120 | 1993           | 50  |  |
|  | 11L020 | 1984 -<br>2011 | 150 |  |
|  | 13L209 | 1996 -<br>1997 | 110 |  |
|  | 12L047 | 1987 -<br>1991 | 169 |  |
|  | 13L205 | 1996 -<br>1997 | 70  |  |
|  | 13L190 | 1996 -<br>1997 | 100 |  |
|  | 13L204 | 1996 -<br>1997 | 78  |  |
|  | 13L206 | 1996 -<br>1997 | 79  |  |
|  | 13L208 | 1996 -<br>1997 | 108 |  |
|  | 11L023 | 1985 -<br>1994 | 109 |  |
|  | 13L207 | 1996 -<br>1997 | 110 |  |
|  | 13L189 | 1996 -<br>1997 | 125 |  |
|  | 13L186 | 1994 -<br>1997 | 195 |  |
|  | 13L185 | 1996 -<br>1997 | 173 |  |
|  | 13L184 | 1996 -<br>1997 | 192 |  |
|  | 13L184 | 1996 -<br>1997 | 201 |  |
|  | 13L056 | 1984 -<br>1994 | 199 |  |
|  | 14L048 | 1996 -<br>2008 | 135 |  |
|  | 13L188 | 1996 -<br>1997 | 192 |  |
|  | 13L187 | -              | 190 |  |

|  |        |                |     |  |
|--|--------|----------------|-----|--|
|  | 13L181 | 1996 -<br>1998 | 225 |  |
|  | 11L111 | 1992 -<br>2011 | 125 |  |
|  | 13L057 | 1982 -<br>2008 | 150 |  |
|  | 11L077 | 1974 -<br>2008 | 130 |  |
|  | 11L070 | 1973 -<br>1998 | 135 |  |
|  | 11L116 | 1993 -<br>2008 | 150 |  |
|  | 11L117 | 1993 -<br>2019 | 64  |  |
|  | 12L298 | 1991           | 34  |  |
|  | 12L297 | 1990 -<br>1991 | 68  |  |
|  | 12L300 | 1991           | 52  |  |
|  | 12L267 | 1989 -<br>1994 | 187 |  |
|  | 12L299 | 1991           | 38  |  |
|  | 11L092 | 1980 -<br>2011 | 125 |  |
|  | 11L022 | 1982 -<br>1987 | 110 |  |
|  | 12L292 | 1990 -<br>1994 | 74  |  |
|  | 12L293 | 1990 -<br>1991 | 69  |  |
|  | 12L294 | 1990 -<br>2011 | 30  |  |
|  | 12L307 | 1991 -<br>1992 | 130 |  |
|  | 11L003 | 1977 -<br>2008 | 86  |  |
|  | 13L014 | 1979 -<br>1994 | 99  |  |
|  | 11L115 | 1992 -<br>2008 | 150 |  |
|  | 13L058 | 1985 -<br>1998 | 173 |  |



|  |           |         |                |     |           |
|--|-----------|---------|----------------|-----|-----------|
|  |           | 12L044  | 1982 -<br>1988 | 91  |           |
|  |           | 11L021  | 1982 -<br>1998 | 82  |           |
|  |           | 11L017  | 1983 -<br>1988 | 144 |           |
|  |           | 13L052  | 1982 -<br>2008 | 105 |           |
|  |           | 11L110  | 1991           | 280 |           |
|  |           | 11L112  | 1992 -<br>2011 | 180 |           |
|  |           | 11L103  | 1986           | 140 |           |
|  |           | 13L047  | 1977 -<br>2011 | 256 |           |
|  |           | 13L003  | 1963 -<br>2000 | 243 |           |
|  | Claiborne | 11L001* | 1978 -<br>2021 | 251 | 642.03226 |
|  |           | 12L019* | 2007 -<br>2021 | 257 |           |
|  |           | 13L015* | 1979 -<br>2021 | 351 |           |
|  |           | 11K002  | 1979 -<br>2005 | 320 |           |
|  |           | 13K002  | 1979 -<br>1992 | 340 |           |
|  |           | 12L402  | -              | 452 |           |
|  |           | 13L011  | 1977 -<br>2014 | 418 |           |
|  |           | 13L018  | 1957           | 900 |           |
|  |           | 13L240  | -              | 614 |           |
|  |           | 12L013  | 1975           | 900 |           |
|  |           | 11L109  | 1989           | 370 |           |
|  |           | 12L008  | 1952           | 800 |           |
|  |           | 12L003  | 1939 -<br>1957 | 768 |           |
|  |           | 12L005  | 1975           | 868 |           |
|  |           | 12L398  | -              | 850 |           |
|  |           | 11L107  | 1989           | 360 |           |
|  |           | 13L026  | 1978           | 942 |           |

|        |          |         |                |     |           |
|--------|----------|---------|----------------|-----|-----------|
|        |          | 13L027  | 1978 -<br>1980 | 942 |           |
|        |          | 12L007  | 1953           | 725 |           |
|        |          | 13L016  | 1979 -<br>1980 | 560 |           |
|        |          | 12L399  | -              | 475 |           |
|        |          | 13L021  | 1979           | 560 |           |
|        |          | 13L004  | 1954           | 700 |           |
|        |          | 13L244  | -              | 830 |           |
|        |          | 12L010  | 1955 -<br>1976 | 895 |           |
|        |          | 13L017  | 1979 -<br>1980 | 550 |           |
|        |          | 13L002  | 1979           | 550 |           |
|        |          | 12L017  | 1975           | 820 |           |
|        |          | 12L012  | 1975           | 855 |           |
|        |          | 11L024  | -              | 840 |           |
|        |          | 12L015  | 1975           | 840 |           |
| Early* | Floridan | 06G006* | 1982 -<br>2021 | 123 | 158.86486 |
|        |          | 08K001* | 1981 -<br>2021 | 125 |           |
|        |          | 06H007  | 1977 -<br>1990 | 165 |           |
|        |          | 06H013  | 1977 -<br>2011 | 150 |           |
|        |          | 06H019  | -              | 140 |           |
|        |          | 06H017  | 2002 -<br>2019 | 245 |           |
|        |          | 06H005  | 1977 -<br>1998 | 140 |           |
|        |          | 06H009  | 1977 -<br>2011 | 160 |           |
|        |          | 06H012  | 1977 -<br>2008 | 205 |           |
|        |          | 05H002  | -              | 200 |           |
|        |          | 05H008  | 1977 -<br>2011 | 145 |           |
|        |          | 05H021  | 2010 -<br>2011 | 110 |           |

|  |           |         |                |     |           |
|--|-----------|---------|----------------|-----|-----------|
|  |           | 06H011  | 1980 -<br>1990 | 120 |           |
|  |           | 05J007  | 1980 -<br>2011 | 100 |           |
|  |           | 05J002  | 1962           | 276 |           |
|  |           | 05J006  | 1971 -<br>1985 | 93  |           |
|  |           | 06J010  | 2010 -<br>2012 | 275 |           |
|  |           | 06J007  | -              | 130 |           |
|  |           | 06J004  | 2002           | 75  |           |
|  |           | 06J002  | 1971 -<br>1990 | 145 |           |
|  |           | 08J016  | -              | 132 |           |
|  |           | 08J015  | 1978 -<br>2008 | 160 |           |
|  |           | 08J001  | 1953 -<br>1976 | 131 |           |
|  |           | 08J019  | -              | 140 |           |
|  |           | 06J009  | 2010 -<br>2011 | 160 |           |
|  |           | 06J011  | -              | 200 |           |
|  |           | 05J009  | -              | 165 |           |
|  |           | 08J020  | -              | 131 |           |
|  |           | 08J005  | 1977 -<br>2000 | 100 |           |
|  |           | 08J013  | 1977 -<br>1982 | 243 |           |
|  |           | 07K015  | 2010 -<br>2011 | 200 |           |
|  |           | 06K020  | 2010           | 72  |           |
|  |           | 08K024  | -              | 103 |           |
|  |           | 08K016  | 1969 -<br>1999 | 260 |           |
|  |           | 08K013  | 1977 -<br>2008 | 155 |           |
|  |           | 07K016  | -              | 160 |           |
|  |           | 08K015  | 1977 -<br>1998 | 244 |           |
|  | Claiborne | 08K025* | 2017 -<br>2021 | 290 | 313.58333 |

|       |          |         |                |     |           |
|-------|----------|---------|----------------|-----|-----------|
|       |          | 06K010* | 1981 -<br>2021 | 140 |           |
|       |          | 06G011  | 1977 -<br>1994 | 200 |           |
|       |          | 05H006  | 1965 -<br>1994 | 494 |           |
|       |          | 05H007  | 1975 -<br>2011 | 455 |           |
|       |          | 05H015  | 1982 -<br>1992 | 380 |           |
|       |          | 05H001  | 1961 -<br>1979 | 380 |           |
|       |          | 05H009  | 1979 -<br>1986 | 460 |           |
|       |          | 05H010  | 1977 -<br>2011 | 326 |           |
|       |          | 07K009  | 1973 -<br>2011 | 198 |           |
|       |          | 08K026  | -              | 295 |           |
|       |          | 06K004  | 1951           | 145 |           |
| Lee** | Floridan | 12M017* | 1985 -<br>2021 | 181 | 165.73171 |
|       |          | 12M026  | 1985 -<br>1998 | 220 |           |
|       |          | 13P016  | -              | 130 |           |
|       |          | 11M039  | -              | 175 |           |
|       |          | 12M057  | -              | 159 |           |
|       |          | 11M018  | 1984           | 160 |           |
|       |          | 12M021  | 1982 -<br>1998 | 180 |           |
|       |          | 12M059  | -              | 190 |           |
|       |          | 13M081  | 1983 -<br>1998 | 150 |           |
|       |          | 12M022  | 1982 -<br>2000 | 164 |           |
|       |          | 13M013  | 1985 -<br>1999 | 170 |           |
|       |          | 13M064  | 1983 -<br>1998 | 250 |           |
|       |          | 13M003  | 1983 -<br>1990 | 163 |           |

|  |        |                |     |  |
|--|--------|----------------|-----|--|
|  | 12M003 | 1979 -<br>1998 | 140 |  |
|  | 11M010 | 1977 -<br>2008 | 120 |  |
|  | 12M015 | 1976 -<br>1985 | 105 |  |
|  | 13M083 | 1983 -<br>1994 | 165 |  |
|  | 13M088 | 207            |     |  |
|  | 12M035 | 1996           | 165 |  |
|  | 13M063 | 1983 -<br>1994 | 160 |  |
|  | 13M008 | 1983 -<br>1998 | 143 |  |
|  | 12M060 | 2010           | 125 |  |
|  | 13M082 | 1983 -<br>1998 | 160 |  |
|  | 12M013 | 1967 -<br>2000 | 158 |  |
|  | 13M055 | 1983 -<br>1990 | 150 |  |
|  | 13M057 | 1983 -<br>1998 | 163 |  |
|  | 12M010 | 1978 -<br>1999 | 185 |  |
|  | 13M072 | -              | 125 |  |
|  | 13M069 | 1985           | 135 |  |
|  | 13M048 | 1985 -<br>1998 | 135 |  |
|  | 13M073 | -              | 100 |  |
|  | 13M043 | -              | 420 |  |
|  | 13M010 | 1982 -<br>1994 | 215 |  |
|  | 13M011 | 1983 -<br>2000 | 160 |  |
|  | 13M049 | 1985 -<br>2000 | 110 |  |
|  | 11M015 | 1979 -<br>2011 | 213 |  |
|  | 13M014 | 1983 -<br>1993 | 185 |  |

|  |        |                |     |  |
|--|--------|----------------|-----|--|
|  | 13M019 | 1984 -<br>1988 | 20  |  |
|  | 13M012 | 1983 -<br>1994 | 46  |  |
|  | 13M080 | 1983 -<br>2000 | 160 |  |
|  | 13M046 | 1983 -<br>2017 | 105 |  |
|  | 12M034 | 1993 -<br>2002 | 43  |  |
|  | 13M058 | 1983 -<br>1994 | 175 |  |
|  | 13M004 | 1977 -<br>1998 | 140 |  |
|  | 13M056 | 1983 -<br>2011 | 173 |  |
|  | 13M065 | 1983 -<br>2008 | 140 |  |
|  | 12M012 | 1978 -<br>2000 | 135 |  |
|  | 13M059 | 1983 -<br>1998 | 160 |  |
|  | 12M020 | 1980 -<br>1984 | 156 |  |
|  | 13M074 | 1986 -<br>1986 | 150 |  |
|  | 12M004 | 1979 -<br>1990 | 190 |  |
|  | 12M011 | 1958 -<br>2010 | 197 |  |
|  | 13M079 | 1983 -<br>1998 | 155 |  |
|  | 13M075 | 1981           | 173 |  |
|  | 13M077 | 1983 -<br>1994 | 140 |  |
|  | 13M078 | 1983 -<br>1994 | 155 |  |
|  | 13M071 | 1985           | 160 |  |
|  | 13M066 | 1983 -<br>2011 | 120 |  |
|  | 13M060 | 1983 -<br>2000 | 165 |  |

|  |        |                |     |  |
|--|--------|----------------|-----|--|
|  | 13M084 | 1987 -<br>2000 | 110 |  |
|  | 13M009 | 1977 -<br>1986 | 160 |  |
|  | 13M067 | 1983           | 115 |  |
|  | 13M085 | 1987 -<br>1994 | 120 |  |
|  | 13M086 | 1987 -<br>2011 | 160 |  |
|  | 12N006 | -              | 280 |  |
|  | 12N003 | 1978 -<br>1990 | 240 |  |
|  | 12N005 | 1985 -<br>1990 | 98  |  |
|  | 13N003 | 1977 -<br>2011 | 160 |  |
|  | 13N014 | 2010 -<br>2011 | 165 |  |
|  | 13N004 | 1978 -<br>1987 | 300 |  |
|  | 13N009 | 1980 -<br>2010 | 115 |  |
|  | 13N007 | 1978 -<br>2011 | 160 |  |
|  | 12N004 | 1978 -<br>2012 | 200 |  |
|  | 13P005 | 1982 -<br>2008 | 240 |  |
|  | 13P012 | -              | 200 |  |
|  | 11P006 | 1978 -<br>2008 | 319 |  |
|  | 12P012 | 1978 -<br>1998 | 175 |  |
|  | 12N007 | -              | 343 |  |
|  | 13P004 | 1978 -<br>1990 | 140 |  |
|  | 13P014 | -              | 113 |  |
|  | 13P015 | 1999           | 300 |  |
|  | 12P011 | 1978 -<br>1998 | 105 |  |
|  | 12P010 | 1978 -<br>2008 | 185 |  |

|         |           |         |                |     |           |
|---------|-----------|---------|----------------|-----|-----------|
|         | Claiborne | 11P015* | 1984 -<br>2021 | 151 | 299.69231 |
|         |           | 06K010* | 1981 -<br>2021 | 140 |           |
|         |           | 12M001* | 1978 -<br>2021 | 385 |           |
|         |           | 12M058  | -              | 420 |           |
|         |           | 11M038  | -              | 360 |           |
|         |           | 13M087  | -              | 445 |           |
|         |           | 12M056  | -              | 395 |           |
|         |           | 12M019  | 1979 -<br>2010 | 300 |           |
|         |           | 12M014  | 1965           | 380 |           |
|         |           | 11P003  | 1969 -<br>2011 | 195 |           |
|         |           | 11P020  | -              | 185 |           |
|         |           | 11P001  | 1950           | 180 |           |
|         |           | 13P018  | 2010           | 360 |           |
| Miller* | Floridan  | 08G001* | 2007 -<br>2021 | 225 | 160.90323 |
|         |           | 07H002  | 1980 -<br>2015 | 75  |           |
|         |           | 08G014  | -              | 210 |           |
|         |           | 07G027  | 2010 -<br>2011 | 145 |           |
|         |           | 07G029  | -              | 120 |           |
|         |           | 07G022  | -              | 290 |           |
|         |           | 07G020  | 1993           | 55  |           |
|         |           | 08G008  | 1993 -<br>2019 | 69  |           |
|         |           | 09G011  | 1993 -<br>2019 | 36  |           |
|         |           | 09G006  | 1977 -<br>2008 | 220 |           |
|         |           | 07H027  | 2010           | 140 |           |
|         |           | 09H013  | 1978 -<br>1986 | 165 |           |
|         |           | 07H018  | 1992 -<br>2019 | 75  |           |
|         |           | 06H003  | 1977 -<br>2000 | 180 |           |



|           |           |         |                |      |           |
|-----------|-----------|---------|----------------|------|-----------|
|           |           | 09H012  | 1979 -<br>2011 | 205  |           |
|           |           | 08H011  | 1979 -<br>1990 | 121  |           |
|           |           | 08H010  | 1981 -<br>2011 | 210  |           |
|           |           | 08H001  | 1963           | 234  |           |
|           |           | 08H002  | 1963           | 135  |           |
|           |           | 08H015  | -              | 210  |           |
|           |           | 06H001  | 1964           | 135  |           |
|           |           | 08H012  | 1990 -<br>2000 | 80   |           |
|           |           | 08H018  | -              | 180  |           |
|           |           | 06H022  | 2010 -<br>2011 | 180  |           |
|           |           | 09H011  | 1977 -<br>2008 | 195  |           |
|           |           | 08H017  | -              | 200  |           |
|           |           | 06H016  | 1993 -<br>2001 | 38   |           |
|           |           | 07H001  | 1964           | 390  |           |
|           |           | 07H026  | 2010 -<br>2011 | 150  |           |
|           |           | 08H007  | 1977 -<br>2008 | 200  |           |
|           |           | 07H025  | 2007 -<br>2011 | 120  |           |
|           | Claiborne | 08H016  | -              | 740  |           |
|           |           | 07H024  | 1993 -<br>2019 | 140  |           |
|           |           |         |                | 440  |           |
| Mitchell* | Floridan  | 10G313* | 1976 -<br>2021 | 206  | 351.89091 |
|           |           | 11J030* | 2018 -<br>2021 | 236  |           |
|           |           | 13J004* | 1978 -<br>2021 | 208  |           |
|           |           | 12K001* | 1976 -<br>2021 | 270  |           |
|           |           | 13K013  | 1976 -<br>1986 | 2010 |           |
|           |           | 13K008  | 1976           | 295  |           |

|  |        |                |     |  |
|--|--------|----------------|-----|--|
|  | 12J003 | 1979 -<br>1994 | 82  |  |
|  | 12G046 | 2004           | 740 |  |
|  | 10G317 | 2007 -<br>2010 | 175 |  |
|  | 13G009 | -              | 387 |  |
|  | 10G314 | 2002 -<br>2019 | 370 |  |
|  | 12G039 | 1972           | 822 |  |
|  | 12G041 | -              | 577 |  |
|  | 12G001 | 1942           | 720 |  |
|  | 10H012 | 2010           | 225 |  |
|  | 12H015 | -              | 351 |  |
|  | 10H006 | 1979 -<br>2011 | 200 |  |
|  | 11H005 | 1977 -<br>1990 | 185 |  |
|  | 13H011 | -              | 700 |  |
|  | 11H001 | 1966           | 110 |  |
|  | 12H023 | -              | 200 |  |
|  | 13H006 | 1960           | 305 |  |
|  | 13H004 | -              | 316 |  |
|  | 13H009 | 1967           | 345 |  |
|  | 12H012 | -              | 221 |  |
|  | 10H003 | 1980 -<br>2000 | 84  |  |
|  | 12H011 | 1960           | 287 |  |
|  | 13H012 | 2010           | 455 |  |
|  | 12H019 | 2009           | 98  |  |
|  | 12H020 | 2009           | 133 |  |
|  | 12H014 | -              | 350 |  |
|  | 12H008 | 1976 -<br>2019 | 341 |  |
|  | 12H024 | -              | 320 |  |
|  | 12H004 | 1941           | 396 |  |
|  | 12H003 | 1989           | 207 |  |
|  | 13H005 | -              | 380 |  |
|  | 13H007 | 1976 -<br>1990 | 320 |  |

|           |           |         |                |     |       |
|-----------|-----------|---------|----------------|-----|-------|
|           |           | 12J004  | -              | 220 |       |
|           |           | 11J001  | 1979 -<br>2013 | 190 |       |
|           |           | 11J018  | 1977 -<br>2008 | 200 |       |
|           |           | 12J005  | -              | 300 |       |
|           |           | 11J019  | 1977 -<br>1999 | 225 |       |
|           |           | 13J015  | 2010           | 560 |       |
|           |           | 13J001  | 1976 -<br>2011 | 431 |       |
|           |           | 11J012  | 1982 -<br>2018 | 225 |       |
|           |           | 11J016  | 1979 -<br>2008 | 206 |       |
|           |           | 13J007  | 1990 -<br>1991 | 150 |       |
|           |           | 12J002  | 1979 -<br>2010 | 200 |       |
|           |           | 13J009  | -              | 497 |       |
|           |           | 12J001  | 1942           | 460 |       |
|           |           | 13J014  | 2010 -<br>2012 | 500 |       |
|           |           | 13K023  | 1985 -<br>2008 | 386 |       |
|           |           | 13K007  | 1978 -<br>1978 | 285 |       |
|           |           | 13K001  | 1963 -<br>1989 | 382 |       |
|           |           | 13K021  | 1985 -<br>2006 | 310 |       |
|           | Claiborne | 11J011* | 1981 -<br>2021 | 417 | 689.4 |
|           |           | 11J025* | 2018 -<br>2021 | 710 |       |
|           |           | 10H013  | -              | 820 |       |
|           |           | 11J029  | -              | 700 |       |
|           |           | 11H016  | -              | 800 |       |
| Randolph* | Floridan  | 07M004  | 1992           | 75  | 65    |
|           |           | 07M003  | 1979 -<br>2011 | 60  |       |

|         |           |         |                |     |           |
|---------|-----------|---------|----------------|-----|-----------|
|         |           | 08M004  | 1992           | 70  | 101.875   |
|         |           | 08P003  | 1992           | 55  |           |
|         | Claiborne | 09M009* | 2007 -<br>2021 | 94  |           |
|         |           | 07L014  | 1984 -<br>2011 | 124 |           |
|         |           | 07M003  | 1972 -<br>2011 | 50  |           |
|         |           | 09N003  | 1949           | 135 |           |
|         |           | 09N002  | 1978 -<br>1994 | 134 |           |
|         |           | 07N007  | 1979 -<br>2011 | 68  |           |
|         |           | 09N006  | 1979 -<br>2011 | 90  |           |
|         |           | 08P001  | -              | 120 |           |
| Terrell | Floridan  | 10M003  | 1980 -<br>2008 | 176 | 158.10526 |
|         |           | 10M020  | -              | 200 |           |
|         |           | 11M025  | 1992 -<br>2012 | 120 |           |
|         |           | 11M006  | 1980 -<br>1991 | 120 |           |
|         |           | 10M016  | -              | 95  |           |
|         |           | 11M007  | 1980 -<br>2008 | 95  |           |
|         |           | 11M031  | -              | 150 |           |
|         |           | 11M032  | -              | 160 |           |
|         |           | 11M034  | 2002           | 90  |           |
|         |           | 10M019  | 2010           | 190 |           |
|         |           | 11M041  | 2010 -<br>2011 | 165 |           |
|         |           | 10M021  | -              | 250 |           |
|         |           | 10N013  | 1980 -<br>1990 | 140 |           |
|         |           | 10N012  | 1980 -<br>2000 | 103 |           |
|         |           | 10N024  | 2010 -<br>2012 | 90  |           |
|         |           | 11N011  | 2010           | 150 |           |
|         |           | 11N013  | -              | 300 |           |

|        |           |         |                |     |           |
|--------|-----------|---------|----------------|-----|-----------|
|        |           | 10N025  | -              | 350 |           |
|        |           | 09P005  | 1979 -<br>1992 | 60  |           |
|        | Claiborne | 11M011  | 1978 -<br>2011 | 320 | 257.66667 |
|        |           | 11M024  | -              | 320 |           |
|        |           | 10M009  | 1979 -<br>1989 | 430 |           |
|        |           | 11M013  | 1978 -<br>2011 | 320 |           |
|        |           | 11M003  | 1953 -<br>1994 | 115 |           |
|        |           | 11M001  | 1953 -<br>2011 | 202 |           |
|        |           | 11M042  | 2010 -<br>2011 | 240 |           |
|        |           | 09N011  | 2008 -<br>2011 | 210 |           |
|        |           | 10N017  | 1978 -<br>2011 | 180 |           |
|        |           | 11N006  | 1979 -<br>2011 | 135 |           |
|        |           | 11N007  | 1979 -<br>2011 | 120 |           |
|        |           | 11N012  | -              | 500 |           |
| Worth* | Floridan  | 13M006* | 1982 -<br>2021 | 123 | 350.34615 |
|        |           | 15L020* | 1977 -<br>2021 | 450 |           |
|        |           | 16K034  | 2004 -<br>2008 | 354 |           |
|        |           | 16J037  | 2008           | 520 |           |
|        |           | 16J042  | 2005           | 490 |           |
|        |           | 15J018  | 1990 -<br>2008 | 460 |           |
|        |           | 14J003  | 1990           | 280 |           |
|        |           | 16J036  | 1998 -<br>2008 | 290 |           |
|        |           | 16J041  | 2008           | 440 |           |
|        |           | 16J011  | 1970 -<br>2006 | 570 |           |
|        |           | 16J047  | 1970           | 440 |           |

|  |        |                |     |
|--|--------|----------------|-----|
|  | 14J028 | -              | 540 |
|  | 16J043 | 2008           | 640 |
|  | 14J027 | 1996 -<br>2008 | 460 |
|  | 14J006 | -              | 250 |
|  | 15K014 | 2008           | 552 |
|  | 15J006 | -              | 305 |
|  | 15K006 | 1976           | 305 |
|  | 16K038 | -              | 420 |
|  | 16K050 | 2008           | 620 |
|  | 14K060 | -              | 460 |
|  | 15K019 | 2000           | 400 |
|  | 16K016 | 1968 -<br>2019 | 610 |
|  | 16K025 | -              | 540 |
|  | 15K017 | 1995 -<br>2007 | 440 |
|  | 14N012 | 2008 -<br>2010 | 200 |
|  | 14N001 | 1943 -<br>1967 | 325 |
|  | 14N004 | 1980 -<br>2019 | 250 |
|  | 15N005 | 2003           | 260 |
|  | 15N006 | 2002           | 210 |
|  | 15N007 | -              | 250 |
|  | 14N013 | 1997 -<br>2008 | 270 |
|  | 14M008 | 1982 -<br>1999 | 102 |
|  | 14M020 | 1996           | 300 |
|  | 13M051 | 1985 -<br>1999 | 245 |
|  | 14M021 | 1996           | 210 |
|  | 15M008 | 1998 -<br>2008 | 260 |
|  | 15M021 | 2008           | 170 |
|  | 14M019 | 1998           | 250 |
|  | 15M007 | 1998 -<br>2008 | 260 |

|  |  |        |                |     |
|--|--|--------|----------------|-----|
|  |  | 15M009 | 1996 -<br>2008 | 220 |
|  |  | 15M019 | 2008           | 82  |
|  |  | 14M018 | 1996 -<br>2008 | 205 |
|  |  | 15M011 | 1997           | 220 |
|  |  | 14M017 | 1995 -<br>2008 | 220 |
|  |  | 15M012 | 1997           | 300 |
|  |  | 14M001 | 1964 -<br>1965 | 215 |
|  |  | 15M022 | 2008           | 122 |
|  |  | 15M023 | 2008           | 170 |
|  |  | 16L032 | 2008           | 575 |
|  |  | 14L056 | 2007 -<br>2008 | 320 |
|  |  | 14L046 | 1992 -<br>2009 | 162 |
|  |  | 14L009 | 1985 -<br>1991 | 238 |
|  |  | 16L023 | 1996 -<br>2007 | 500 |
|  |  | 16L025 | 2007           | 490 |
|  |  | 15L053 | 1993 -<br>2008 | 480 |
|  |  | 14L006 | 1977 -<br>2011 | 235 |
|  |  | 16L024 | 2008           | 400 |
|  |  | 16L026 | 2007           | 460 |
|  |  | 16L011 | 1969           | 210 |
|  |  | 14L002 | 1965           | 460 |
|  |  | 16L030 | 2006           | 460 |
|  |  | 15L042 | -              | 196 |
|  |  | 16K024 | 2008           | 420 |
|  |  | 14J600 | 1966           | 250 |
|  |  | 16K035 | 1997           | 580 |
|  |  | 14K003 | 165            | 370 |
|  |  | 16K055 | 2008           | 340 |
|  |  | 16K031 | 1998 -<br>2007 | 450 |

|  |           |         |                |     |     |
|--|-----------|---------|----------------|-----|-----|
|  |           | 16K029  | 2008           | 400 |     |
|  |           | 15K018  | 1997           | 460 |     |
|  |           | 14L057  | 1998 -<br>2008 | 480 |     |
|  |           | 16L027  | 2007           | 380 |     |
|  |           | 16L001  | 1965           | 410 |     |
|  |           | 15L042  | -              | 196 |     |
|  |           | 16L011  | 1969           | 210 |     |
|  |           | 16L031  | 2006           | 460 |     |
|  |           | 16L028  | 2006 -<br>2007 | 460 |     |
|  | Claiborne | 15K016  | 1998 -<br>2008 | 740 | 534 |
|  |           | 14K059  | 1997 -<br>2008 | 600 |     |
|  |           | 16K052  | 2008           | 725 |     |
|  |           | 13M005* | 2007 -<br>2021 | 345 |     |
|  |           | 14N016  | 2009 -<br>2017 | 460 |     |
|  |           | 15N008  | 1990 -<br>2010 | 334 |     |



Table S5: Water Application Rates (Acre-feet/acre) by County and Crop

| County    | Weather | Corn | Cotton | Peanut | Soybean |
|-----------|---------|------|--------|--------|---------|
| Baker     | 50%ile  | 0.8  | 0.7    | 0.8    | 0.5     |
|           | 90%ile  | 1.3  | 1.2    | 1.2    | 0.9     |
| Calhoun   | 50%ile  | 0.8  | 0.7    | 0.7    | 0.5     |
|           | 90%ile  | 1.2  | 1.1    | 1.2    | 0.9     |
| Decatur   | 50%ile  | 0.6  | 0.4    | 0.6    | 0.4     |
|           | 90%ile  | 1.1  | 0.9    | 1.0    | 0.8     |
| Dougherty | 50%ile  | 0.7  | 0.6    | 0.6    | 0.5     |
|           | 90%ile  | 1.1  | 1.0    | 1.1    | 0.8     |
| Early     | 50%ile  | 0.7  | 0.5    | 0.5    | 0.4     |
|           | 90%ile  | 1.1  | 1.0    | 1.0    | 0.7     |
| Lee       | 50%ile  | 0.7  | 0.5    | 0.5    | 0.4     |
|           | 90%ile  | 1.1  | 1.0    | 1.0    | 0.7     |
| Miller    | 50%ile  | 0.9  | 0.6    | 0.5    | 0.3     |
|           | 90%ile  | 1.3  | 1.1    | 0.9    | 0.5     |
| Mitchell  | 50%ile  | 0.8  | 0.6    | 0.7    | 0.5     |
|           | 90%ile  | 1.3  | 1.1    | 1.2    | 0.8     |
| Randolph  | 50%ile  | 0.7  | 0.3    | 0.4    | 0.4     |
|           | 90%ile  | 1.2  | 1.0    | 1.1    | 0.8     |
| Terrell   | 50%ile  | 0.7  | 0.6    | 0.7    | 0.5     |
|           | 90%ile  | 1.2  | 1.1    | 1.2    | 0.9     |
| Worth     | 50%ile  | 0.6  | 0.4    | 0.4    | 0.2     |
|           | 90%ile  | 1.1  | 0.9    | 0.8    | 0.5     |
